# Supplementary material for: VANGL2 regulates luminal epithelial organization and cell turnover in the mammary gland
Source: PubMed Central journal article supplement (PMC6506599; doi:10.1038/s41598-019-43444-8), 2019-05-08
Supplement: 41598_2019_43444_MOESM1_ESM.pdf [file 41598_2019_43444_MOESM1_ESM.pdf]

**VANGL2 regulates luminal epithelial organization  
and cell turnover in the mammary gland**

Prestina Smith, Nathan Godde, Stefany Rubio, Melawit Tekeste  
Eszter K. Vladar, Jeffrey D. Axelrod, Deborah J. Henderson, Michal Milgrom-Hoffman,  
Patrick O. Humbert, Lindsay Hinck

## SUPPLEMENTAL FIGURE LEGENDS:

**Supplemental Figure1: *Vangl1* and *Vangl2* expression in FACS purified mammary cell populations.** (A) Analysis of *Vangl1* and *Vangl2* expression within separate FACS purified mammary cell populations using a previously published microarray dataset (GSE19446) and normalised to relative stroma expression. Expression of differentiation markers *SMA* and *K18* confirmed purity of basal and luminal cell populations, respectively.

**Supplemental Figure2: VANGL loss of function phenotypes in the mammary gland phenocopy PCP defects.** (A) Immunostaining in 6 weeks old *MMTV-Cre;Vangl2<sup>+/+</sup>* and *MMTV-Cre;Vangl2<sup>fllox/fllox</sup>* glands and quantitation of Ki67 or Cleaved Caspase 3 in ducts and TEBs (n=3-5 mice per genotype). Data are represented as mean +/- SEM. Scale bar represents 100µm. Student's t-test \*p<0.05. (B) Immunostaining of WT and *Vangl2<sup>Lp/Lp</sup>* tissue showing VANGL1 (green) localization in mammary ducts. (C-D) Representative whole mount images of contralaterally transplanted, carmine stained *WT* and *Vangl2<sup>Lp/Lp</sup>* outgrowths 12 weeks post-transplantation, showing supernumerary end buds (C) and acini (D). (E) CDH1 immunostaining (red) of *WT* and *Vangl2<sup>Lp/Lp</sup>* tissue showing altered morphology in *Vangl2<sup>Lp/Lp</sup>* ducts. Representative whole mount images of contralaterally transplanted, carmine stained *WT* and *Vangl2<sup>Lp/Lp</sup>* outgrowths 12 weeks post-transplantation, showing dilated ducts (F). (G) Phalloidin (red) staining in *WT* and *Vangl2<sup>Lp/Lp</sup>* ducts. (H) Immunostaining of *WT* 8-week tissue showing PK2 cytoplasmic and membrane localization in mammary ducts. (I) Representative whole mount images of carmine stained *Pk2<sup>+/-</sup>* outgrowths 12 weeks post-transplantation display dilated ducts compared to *WT* control. Lu denoted lumen. Scale bars represent 1.5mm (C, D, F, I) and 20µm (B, E, G, H).

**Supplemental Figure 3: Depletion of VANGL2 in basal versus luminal cell populations reduces Bmi1 expression.** (A) RT-qPCR analysis of *Vangl2* mRNA levels in WT and *Vangl2* knockdown primary cells. (B) Representative immunoblots of VANGL2 and GAPDH (control) in primary cells transduced with two constructs (C1, C2) to knockdown *Vangl2* (n=3). (C) qRT-PCR analysis of *Axin2*, *Ptch2* and *Bmi1* expression in WT and *Vangl2*<sup>Lp/Lp</sup> outgrowths. (D) qRT-PCR analysis of *Axin2*, *Ptch2* and *Bmi1* expression in *MMTV-Cre;Vangl2*<sup>fllox/fllox</sup> mammary glands compared to Cre only control. n=3 biological replicates. Data are represented as mean ± SEM.

**Supplemental Figure 4: Full scans of immunoblots used in Figure 1E and Supplemental Figure 3B.** Red rectangles delineate regions used in main figures.

**Supplemental Table 1:** qPCR primers used in these studies.

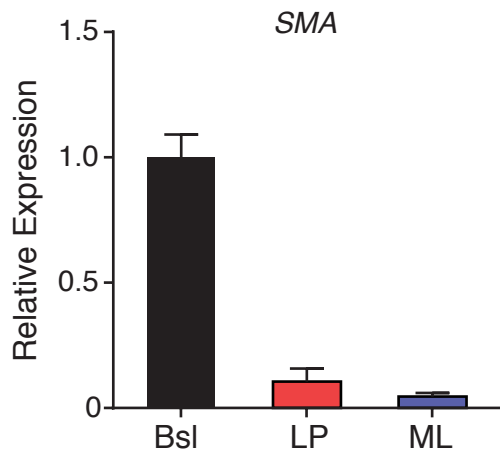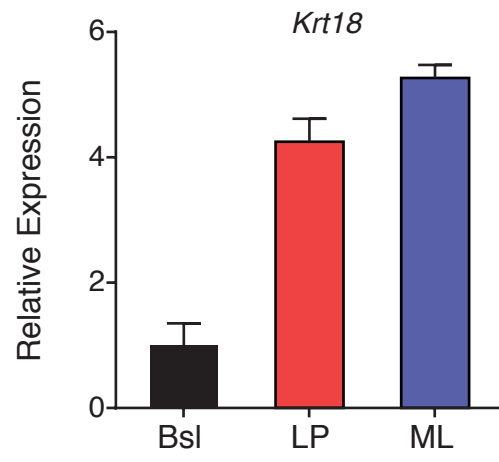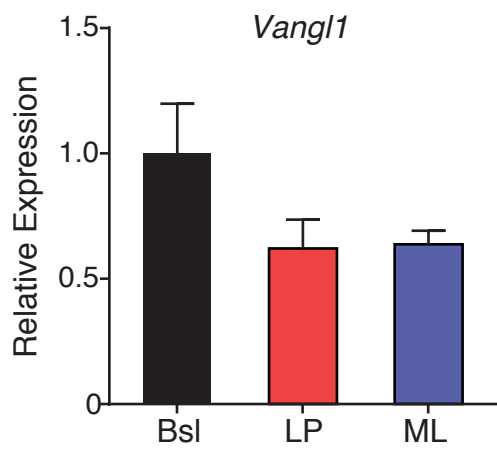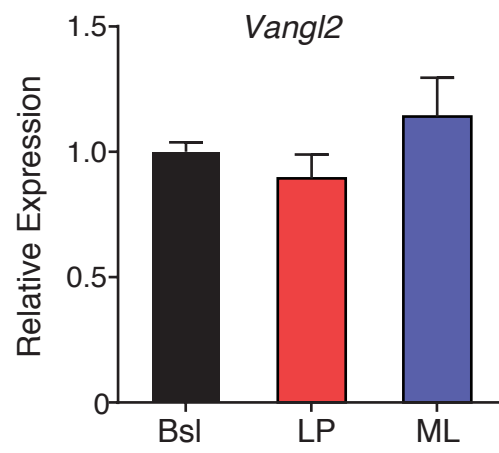



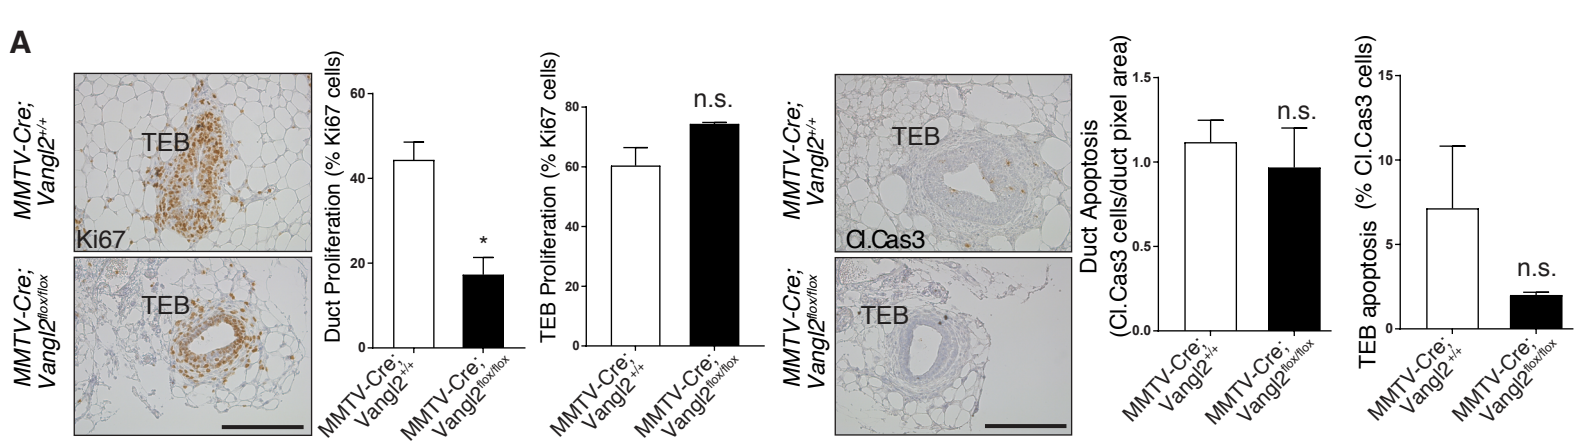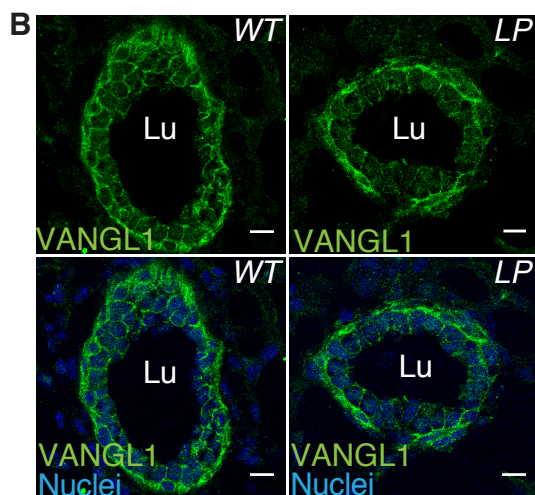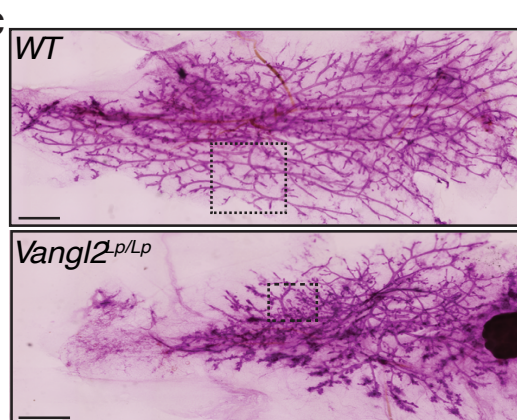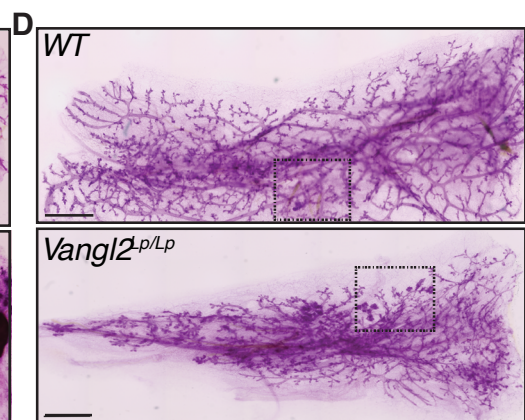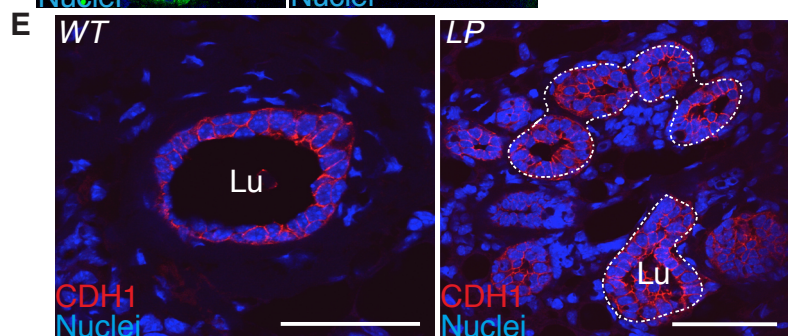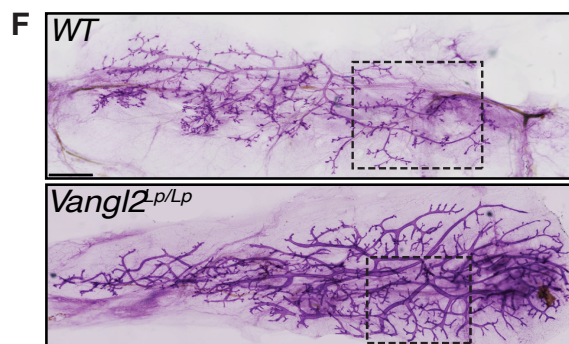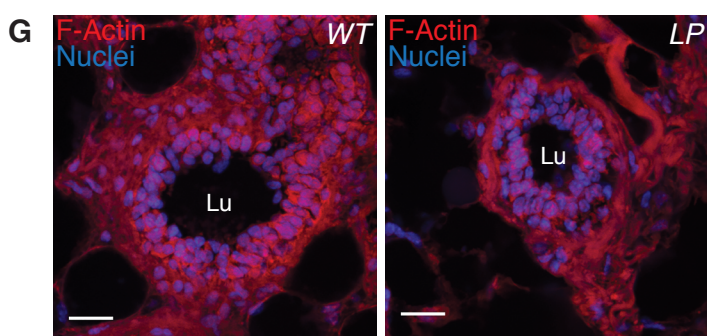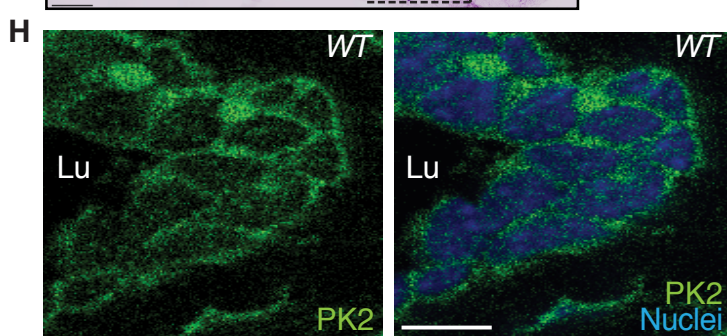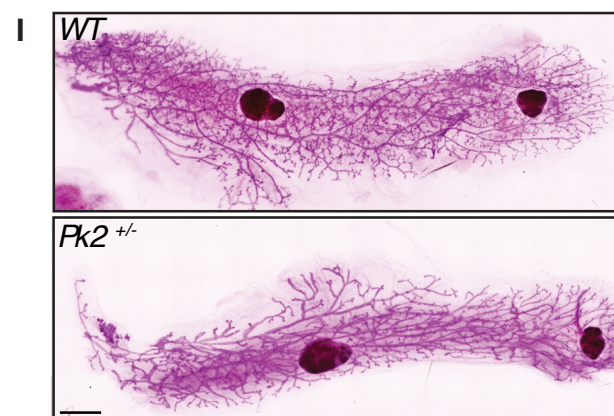

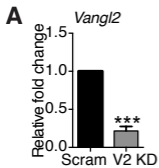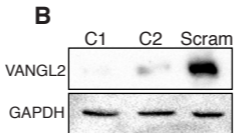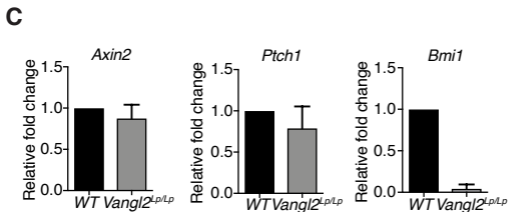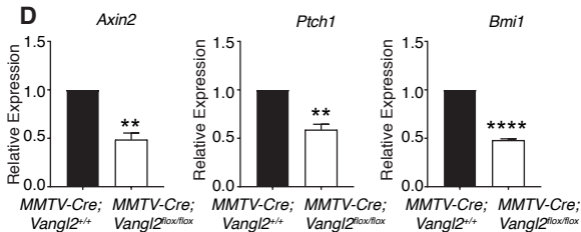

**Figure 1E**

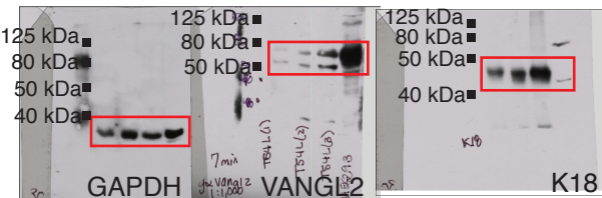

**Sup. Figure 3B**

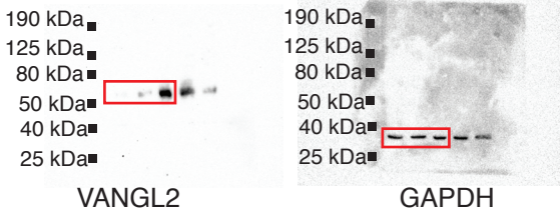

| Gene          | Forward                 | Reverse                 |
|---------------|-------------------------|-------------------------|
| <i>Axin2</i>  | GCAGCTCAGCAAAAAGGGAAA T | TACATGGGGAGCACTGTCTCG T |
| <i>Bmi1</i>   | CCAATGAAGACCGAGGAGAA    | TTCCGATCCAATCTGCTCT     |
| <i>Ptch1</i>  | ATGGGCCTCATTGGGATCAA    | AGCATAGCCCTGTGGTTCTT    |
| <i>Vangl1</i> | AAGCAAAGAGCGGATGTG      | CGATGGCAAGGTAGTGA       |
| <i>Vangl1</i> | GATGCTGTTAGGAGGTTCCG    | AGTCCCGCTTCTACAGCTTG    |
| <i>Vangl2</i> | CCAGCCGCTTCTACAATGTC    | TCTCCAGGATCCCACTGC      |
| <i>Vangl2</i> | TGCTGGACAAGTGGGCTTAT    | GTGCGCTGCGGATACAAA      |
| GAPDH         | TTCACCACCATGGAGAAGGC    | CCCTTTTGGCTCCACCT       |
